1 **The Impact of Leishmaniasis on Mental Health and Psychosocial Well-**  
2 **being: A Systematic Review**

3

4 Malini Pires<sup>1</sup>, Barry Wright<sup>1</sup>, Paul M. Kaye<sup>2,3</sup>, Virgínia Conceição<sup>4</sup> and Rachel C.  
5 Churchill<sup>2</sup>

6 <sup>1</sup> Mental Health Research Group, Hull York Medical School and Dept. of Health  
7 Sciences, University of York, YO10 5DD, UK

8 <sup>2</sup> Centre for Reviews and Dissemination, University of York, YO10 5DD UK

9 <sup>3</sup>Centre for Immunology and Infection, Hull York Medical School and Dept. of  
10 Biology, University of York, YO10 5DD, UK

11 <sup>4</sup> Institute of Public Health, University of Porto, 4050-600 Porto, Portugal

12

13 **Correspondence:** MP email [malini.pires@york.ac.uk](mailto:malini.pires@york.ac.uk)

14 **Keywords:** Systematic review; leishmaniasis; mental health; mental illness;  
15 psychosocial morbidity; quality of life; neglected tropical disease

16

18 **ABSTRACT**

19 *Background:* Leishmaniasis is a neglected tropical parasitic disease endemic in South  
20 Asia, East Africa, South America and the Middle East. It is associated with low  
21 socioeconomic status (SES) and responsible for considerable mortality and morbidity.  
22 Reports suggest that patients with leishmaniasis may have a higher risk of mental illness  
23 (MI), psychosocial morbidity (PM) and reduced quality of life (QoL), but this is not  
24 well characterised. The aim of this study was to conduct a systematic review to assess  
25 the reported impact of leishmaniasis on mental health and psychosocial wellbeing.

26 *Methods:* A systematic review of the literature was carried out. Pre-specified criteria  
27 were applied to identify publications including observational quantitative studies or  
28 systematic reviews. Two reviewers screened all of the titles, abstracts and full-studies  
29 and a third reviewer was consulted for disagreements. Data was extracted from papers  
30 meeting the criteria and quality appraisal of the methods was performed using the  
31 Newcastle-Ottawa Scale or the Risk of Bias in Systematic Review tool.

32 *Results:* A total of 14 studies were identified from 12,517 records. Nine cross-sectional,  
33 three case-control, one cohort study and one systematic review were included. Eleven  
34 assessed MI outcomes and were measured with tools specifically designed for this; nine  
35 measured PM and 12 measured QoL using validated measurement tools. Quality  
36 appraisal of the studies showed that six were of good quality. Cutaneous leishmaniasis  
37 and post kala-azar dermal leishmaniasis showed evidence of associated MI and PM  
38 including depression, anxiety and stigma, while all forms of disease showed decreased  
39 QoL. The findings were used to inform a proposed model and conceptual framework to  
40 show the possible links between leishmaniasis and mental health outcomes.

41 *Conclusion:* There is evidence that leishmaniasis has an impact on MI, PM or QoL of  
42 patients and their families and this occurs in all the main subtypes of the disease. There  
43 are however large gaps in the evidence. Further research is required to understand the  
44 full extent of this problem and its mechanistic basis.

45

#### 46 **AUTHOR SUMMARY**

47 Leishmaniasis is a parasitic disease prevalent in many low-and middle-income countries  
48 worldwide. In this study the authors looked for evidence as to whether leishmaniasis  
49 affected the mental health and quality of life of patients. To conduct the review, a wide  
50 search of the literature was conducted, where a total of 14 full articles were included  
51 and analysed. It was found that different forms of leishmaniasis (visceral leishmaniasis,  
52 cutaneous leishmaniasis and post kala-azar dermal leishmaniasis) do cause a significant  
53 impact on patients' mental health and quality of life through societal factors such as  
54 stigma, lack of knowledge, culture and low self-esteem among others. However, no  
55 evidence of biological mechanisms was found linking leishmaniasis to mental illness or  
56 decreased quality of life. Despite being a very incapacitating disease physically,  
57 leishmaniasis also leads to mental illness and decreased quality of life, and should  
58 therefore be a priority on the global health agenda for both researchers and policy  
59 makers.

60

61

62

63

## 64 **Introduction**

65 Leishmaniasis is a neglected tropical disease (NTD) caused by multiple species of  
66 *Leishmania* parasites and transmitted by the bite of female sand flies. It is endemic in 98  
67 countries, and is mostly concentrated in low-and middle-income countries in South  
68 Asia, East Africa, South America and in the Middle East (1). The disease presents in  
69 different forms depending on the species and geographical location. Visceral  
70 leishmaniasis (VL; also known as kala-azar) presents with fever, weight loss,  
71 hepatosplenomegaly and may have neurological manifestations (2). If untreated, it has a  
72 fatality rate of over 95% (3). Post kala-azar dermal leishmaniasis (PKDL), occurring as  
73 a consequence of VL can cause erythematous or hypopigmented macules, papules,  
74 nodules and patches (4). Cutaneous leishmaniasis (CL) patients present with plaques,  
75 nodules and / or ulcers and, in the case of mucocutaneous leishmaniasis (MCL),  
76 symptoms manifest on the mucous membranes of the nasal and oral cavities and  
77 surrounding tissues (5). These forms of leishmaniasis invariably leave visible  
78 disfiguring lesions and lifelong scars on the skin (6,7).

79 Although not fatal, CL lesions have been described in the literature as a source of  
80 distress and discomfort. Such visible manifestations have been linked to stigmatizing  
81 attitudes that could potentially lead to social stigmatisation, (6,9) and psychosocial  
82 morbidity (PM). For example, in Afghanistan, the incorrect belief that the disease can  
83 be transmitted by human contact results in social exclusion that can range from not  
84 sharing utensils to severe physical and emotional isolation (10). In some cultures,  
85 women are considered unfit for marriage or are separated from their children when they  
86 have the disease(10,11). A study involving high school students in Morocco showed  
87 awareness of the stigma attached to CL with self-stigmatization including feelings of  
88 shame, embarrassment, depression, and self-contempt (6).

89 Although inflammation of the liver and spleen are the most well-documented clinical  
90 manifestations of VL, inflammation of the nervous system has also been reported (Lima  
91 et al., 2003, Marangoni et al., 2011). Neurological manifestations in human VL include  
92 peripheral and cranial nerve dysfunction, neurological tremors, meningitis, seizures,  
93 paresis, and haemorrhagic stroke (12–18). In addition, naturally infected dogs with  
94 canine VL as well as rodent models of VL show neuroinflammation (19,20). Despite  
95 these findings and research showing close links in general between neuroinflammation  
96 and mental health problems (21), there is limited evidence of a direct link between the  
97 neuroinflammation present in leishmaniasis and mental health problems.

98         There is a growing body of evidence suggesting a causal link between systemic  
99 and localised inflammation and depression in other mental health disorders (Stewart et  
100 al., 2009; Taraz et al., 2012; Oliveira Miranda et al., 2014; Ford and Erlinger, 2004;  
101 Vogelzangs et al., 2016; Furtado and Katzman, 2015) including 2 meta-analyses that  
102 show statistically significant raised levels of inflammatory markers in depressed  
103 subjects (28,29). Patients with depression often show cardinal features of inflammation,  
104 including increased expression of pro-inflammatory cytokines and their receptors as  
105 well as an upregulation of acute-phase reactants, chemokines and soluble adhesion  
106 molecules in peripheral blood and cerebrospinal fluid (CSF) (25,30,31). In VL, a link  
107 between mental illness (MI) and systemic or neuroinflammation been postulated (20).

108 At the time this review was conducted, there had been no high quality comprehensive  
109 systematic review published on possible aetiological associations and the impact of  
110 leishmaniasis on mental health and psychosocial wellbeing. A search of the Cochrane  
111 Database of Systematic Reviews and the Database of Abstracts of Reviews of Effects  
112 (DARE) identified no systematic reviews of the effects of healthcare interventions for  
113 the potential mental health consequences of leishmaniasis. A detailed search of

114 PROSPERO indicated that no other systematic reviews were in progress. Subsequently,  
115 one scoping review has recently been published (29) making a ‘preliminary assessment  
116 of the extent of the literature’ focusing solely on localised cutaneous leishmaniasis and  
117 with no quality appraisal for included studies.

118 The objective of this study was, therefore, to conduct a comprehensive systematic  
119 review (SR) of MI, PM and quality of life (QoL) related to all forms of leishmaniasis.  
120 Secondary research questions included: i) is there evidence that inflammation resulting  
121 from VL is directly associated with MI?; ii) is there evidence for social stigma against  
122 people with VL? If so, is this associated with MI?; iii) do cognitive and physical  
123 impairments resulting from VL result in MI or PM?; iv) are stigma and discrimination  
124 of patients with post kala-azar dermal leishmaniasis and cutaneous leishmaniasis  
125 associated with MI?; and v) do co-morbidities in people with leishmaniasis have an  
126 association with decreased QoL, increased MI or PM?

127 From this research, we set out to develop a conceptual model for the association  
128 between leishmaniasis, mental health outcomes and PM. This model may serve to  
129 prompt further research and debate and to inform health workers, government bodies  
130 and the scientific community about the nature of and the mental health implications of  
131 leishmaniasis and the unanswered questions surrounding these associations.

132

## 133 **Methods**

134 The review methodology including the search strategy for this review was published in  
135 PROSPERO (32) following CRD (33) and PRISMA (34) guidelines. The  
136 recommendations in the Cochrane Handbook (Higgins and Green et al 2011) were  
137 adhered to for reporting the review.

## 138 **Databases and Search Strategy**

139 The following primary electronic databases were searched after expert advice from  
140 experienced information specialists working in this field: MEDLINE, EMBASE,  
141 PsycINFO, LILACS, POPLINE, Global Health, IndMED, ArabPsyNet and  
142 AfricanIndexMedicus (AIM). There were no restrictions on the date and language of  
143 publication. MEDLINE and EMBASE were chosen as comprehensive databases for  
144 life sciences and biomedical research. PsycINFO is a robust database which contains  
145 psychology-related articles. POPLINE and Global Health are population and public  
146 health-related databases. LILACS, IndMED, ArabPsyNet and AIM were searched as  
147 they contain literature from geographical locations where leishmaniasis is endemic (32).

148

149 The search strategy (S3) was designed to be more sensitive than specific (search  
150 strategy included all possible terms to answer the broad PICOS as opposed to one with  
151 less descriptors) as potentially unknown exposures could exist, and because of the lack  
152 of a previous robust synthesis of this topic. Backward and forward citation tracking was  
153 performed for included studies to find any relevant studies not included in the  
154 databases. After retrieving the results for each database, citations and abstracts were  
155 exported to EndNote to remove duplicates and for screening.

156

## 157 **Rationale for the chosen outcomes**

158 The outcomes were a broad scope of the psychosocial consequences that can result from  
159 leishmaniasis. They were based on three concepts: 1) the biological link between the  
160 neuroinflammation caused in VL and MI; 2) the social impact of stigma, isolation and  
161 discrimination around CL on QoL; 3) any further burden on the patient in terms of QoL  
162 or mental health (including impact on their relatives) such as, for example consequences

163 secondary to outcomes related to mental health (e.g. financial or physical co-  
164 morbidities).

### 165 **Rationale for chosen study designs**

166 Cohort studies, case-controls and cross-sectional studies that quantitatively measured  
167 psychosocial outcomes such as mental illness or QoL using a validated tool in this  
168 population were included. Systematic reviews (including and in addition to the review  
169 by Bennis et al 2018) were also included as a mechanism for identifying relevant  
170 publication for screening.

171

### 172 **Study eligibility criteria**

173 The inclusion and exclusion criteria used to select studies is shown in the protocol (32),  
174 which used an adapted PICOS framework for observational studies. As this study was  
175 examining observational studies and not randomised control studies, there was no  
176 “intervention” being studied, and instead, the term “exposure” was used. There was also  
177 no comparator in observational studies, so this domain was not used.

178

### 179 **Rationale for chosen population**

180 Due to the broad exploratory nature of this systematic review, all patients with any form  
181 of leishmaniasis regardless of age and gender were included. We also included  
182 assessments of how the disease has wider impacts on family and community members  
183 due, for example, to social stigma and financial strain (35,36).

184



185 **Rationale for chosen exposures**

186 The exposures included the social determinants of health associated with leishmaniasis  
187 including: poverty, low social economic status, co-morbid infections, social and cultural  
188 norms, as well as the physical and psychosocial factors that could lead to a decrease in  
189 QoL, PM and MI.

190

191 **Data extraction**

192 Titles and abstracts were downloaded onto EndNote and de-duplicated. These were then  
193 transferred onto an excel spreadsheet and screened independently by two reviewers (MP  
194 and VM). Any disagreement between these two authors were resolved by a third  
195 reviewer (RC). Screening codes for titles and abstracts were also created. After selecting  
196 the included studies, a standard form as used to extract the relevant data. Extracted  
197 information included: study setting; study design; year; time period; study population;  
198 sample size; inclusion rate and attrition (where relevant e.g. for cohort studies); age  
199 range of participants; mean age; sex ratio (M/F); outcome (e.g. anxiety or depression);  
200 statistical test; measurement tool and main findings.

201

202 **Data Synthesis and Quality Assessment**

203 A narrative synthesis of the findings from the included studies was performed. This was  
204 organised according to characteristics of the studied population; outcome and how these  
205 were measured as well as measures of effect. It was expected that the studies would not  
206 be similar enough to conduct a meta-analysis due to the heterogeneity of the primary  
207 studies included in the review e.g. cutaneous, visceral, PKDL; different countries,  
208 different studied populations, different outcome measures and different study designs).

209

## 210 **Quality Assessment and Risk of Bias**

211 The tool to assess quality and risk of bias for the cohort and case-control studies was the  
212 Newcastle-Ottawa Scale (NOS) (37) as suggested in the Cochrane Handbook (38). For  
213 cross-sectional studies, an adapted version of the NOS was used (39). For any SRs  
214 identified during the selection process, the ROBIS tool for assessing the risk of bias was  
215 used. The tool is comprised of three phases: 1) assess relevance, 2) identify concerns  
216 with the review process, and 3) judge risk of bias (40).

217

## 218 **Methodological Quality Appraisal of Studies**

219 The methodological quality of the studies was assessed for the 13 primary studies using  
220 the NOS risk of bias tool, as described above; the systematic review (Bennis et al.,  
221 2018) was assessed using ROBIS. An adapted version of NOS was used to appraise the  
222 quality of the cross-sectional studies (39). The case-control studies and cohort study  
223 were appraised using the original version of NOS.

224

225

## 226 **ROBIS**

227 ROBIS is a very comprehensive tool used to assess the risk of bias in systematic  
228 reviews, and not in primary studies (40). It was used to assess the risk of bias in the  
229 systematic review that met our inclusion criteria (41).

230

231

232

## 233 **RESULTS**

### 234 **Study Characteristics**

235

236 A total of 14 publications (consisting of 13 full articles and 1 conference proceeding)  
237 met all of the inclusion criteria for this systematic review (41,42,51–54,43–50) (S2). All  
238 were independent studies, except two (42,43) where one was the baseline study, and the  
239 other the follow-up study, and published between 2004 and 2018. Three studied VL  
240 (42,43,46); 10 studied CL (41,44,45,48,49,51–55) and one PKDL (50) (Table 1). All  
241 studies were performed in LMICs (Table 1).

242

243

244

**Table 1. General Characteristics of the Included Studies**

| <b>Author<br/>Year<br/>Country</b>         | <b>Study<br/>Design</b> | <b>Sample (population)</b>                                                                                                                  | <b>Leishmani<br/>asis<br/>Subtype</b> | <b>Mental health<br/>consequence<br/>measured<br/>(outcome)</b> | <b>Sample<br/>size</b> | <b>Age in years<br/>(mean±SD<br/>or range (if<br/>mean n/a))</b>             | <b>Gender ratio<br/>(Female %)</b>                          |
|--------------------------------------------|-------------------------|---------------------------------------------------------------------------------------------------------------------------------------------|---------------------------------------|-----------------------------------------------------------------|------------------------|------------------------------------------------------------------------------|-------------------------------------------------------------|
| Alemayehu et al.<br>2017<br>Ethiopia       | Cross-sectional         | HIV infected patients receiving antiretroviral therapy (ART)- with and without VL coinfection at four different sites in Northwest Ethiopia | HIV-VL                                | QoL with WHOQoL-HIV instrument                                  | 590                    | 34.5 (± 7.4)-<br>HIV-VL patients<br><br>36.4 (±8.8)-<br>HIV-only<br>patients | 3.2%-<br>HIV-VL patients<br><br>61.7%-<br>HIV-only patients |
| Alemayehu et al.<br>2018<br>Ethiopia       | Prospective cohort      | Same as above (6-month follow-up)                                                                                                           | HIV-VL                                | QoL with WHOQoL-HIV instrument                                  | 581                    | 34.5 (±7.7)-<br>HIV-VL patients<br><br>36.4 (±8.9)-<br>HIV-only<br>patients  | 5.3%-<br>HIV-VL patients<br><br>61.7%-<br>HIV-only patients |
| Bennis et al.<br>2018<br>Several Countries | Systematic Review       | Patients or their relatives experiencing a skin condition linked to LCL in any country.                                                     | LCL                                   | PM, QoL and MI. No quality appraisal tool used                  | n/a*                   | *                                                                            | *                                                           |
| Chahed et al.<br>2016<br>Tunisia           | Cross-sectional         | CL patients with scars selected randomly in primary health centres                                                                          | CL                                    | QoL, PM and MI with IPQ-R, PSLI and WHOQOL-26                   | 41                     | 12-53                                                                        | 100%                                                        |
| de Castro Toledo et al.<br>2013<br>Brazil  | Cross-sectional         | Patients with confirmed diagnosis of CL with a minimum of 4 years of school education                                                       | CL                                    | QoL with DLQI                                                   | 20                     | 45.6                                                                         | 15%                                                         |

|                                  |                 |                                                                                      |      |                                             |     |                                         |                                    |
|----------------------------------|-----------------|--------------------------------------------------------------------------------------|------|---------------------------------------------|-----|-----------------------------------------|------------------------------------|
| Govil et al.<br>2018<br>India    | Cross-sectional | People living in villages where VL is endemic.                                       | VL   | PM with KAP structured questionnaire        | 353 | 41.7 ( $\pm$ 17.1)                      | 44.5%                              |
| Handjani and Kalafi 2013<br>Iran | Cross-sectional | Family members                                                                       | CL   | QoL with FDLQI                              | 5   | 42                                      | 27%                                |
| Honório et al.<br>2016<br>Brazil | Cross-sectional | CL patients at University Hospital of Brasilia                                       | CL   | QoL, PM, and MI with WHOQOL-BREF            | 44  | 51.8 ( $\pm$ 11.6)                      | 54.5%                              |
| Layegh et al.<br>2017<br>Iran    | Cross-sectional | Children with CL with in dermatology clinics.                                        | CL   | QoL and MI with CDLQI, CDI and STAIC        | 42  | **                                      | 69%                                |
| Pal et al.<br>2017<br>India      | Case-control    | Outpatient and inpatient population.                                                 | PKDL | QoL with DLQI                               | 188 | 27.4- patients<br>29.5 healthy controls | 45.6%- patients<br>44.8%- controls |
| Simsek et al.<br>2008<br>Turkey  | Cross-sectional | Women selected randomly from cluster sampling from households.                       | CL   | MI with SCID-I                              | 270 | 33.3+9.4                                | 100%                               |
| Turan et al.<br>2015<br>Turkey   | Case-control    | Children and adolescents with CL and healthy controls, and their respective mothers. | CL   | MI and QoL with CDI PedQL-C, PedQL-P, STAIC | 54  | 12.0 ( $\pm$ 3.2)                       | 46.3%                              |
| Vares et al.<br>2013<br>Iran     | Cross-sectional | patients >16 years-old with CL                                                       | CL   | QoL and psychosocial morbidity with DLQI    | 124 | 36.9 ( $\pm$ 14.9)                      | 62.9%                              |
| Yanik et al.<br>2004<br>Turkey   | Case-control    | Patients with Active CL and healthy controls from a leishmaniasis treatment centre.  | CL   | QoL, MI and PM with HAD, BIS and DQL        | 99  | 18.8 ( $\pm$ 5.9)                       | 50.5%                              |

**Table 1- General Characteristics of the Included Studies- Summary of data obtained from data extraction process.**

Not applicable \*

Not mentioned \*\*

## 245 **Population and Demographics**

246 Three studies were on VL (42,43,46); 10 studied CL (41,44,45,48,49,51–55); and Pal et  
247 al., 2017 studied PKDL (50). Of the VL studies, two were about HIV patients co-  
248 infected with VL (42,43), which was part of the inclusion criteria for the population.

249 The populations measured in the studies vary greatly in age. Ages of the participants in  
250 the studies ranged from the ages of 7 to 80 years, according to the values reported in the  
251 studies. Two of the studies were in children only (49,52). Most of the studies had both  
252 female and male participants although two (44,51) had an only female population. The  
253 combined number of study participants in the 14 studies was 2565. Sample sizes of the  
254 primary studies ranged from 20 (45) to 620 (42).

255 Female to Male ratio in percentage of female was 57% showing that more women were  
256 studied over-all (excluding the review) (41).

257 All studies, including the systematic review were performed in low-and middle-income  
258 countries, according to the World Bank's listing of these countries; Ethiopia is classified  
259 as low-income, India as a lower-middle income; and Brazil, Turkey and Iran as upper  
260 middle-income (56).

261

## 262 **Study Design**

263 Nine studies were cross-sectional (42,44–46,48,49,51,53,55), three were case-control (  
264 Pal et al., 2017; Turan et al., 2015; Yanik et al., 2004), one was a prospective cohort  
265 study (43) and one a systematic review (41). The characteristics of the 14 included  
266 studied that met the eligibility criteria were assessed for quantitative synthesis.

267

268

269 **Diagnostic Criteria**

270 The different instruments to measure the outcomes for each of the 14 publications are  
271 shown in Table 1.

272

273

274 **Outcomes:**

275 **Visceral leishmaniasis**

276 Two studies by the same authors conducted in Northwest Ethiopia reported the results  
277 of a prospective longitudinal study at baseline (42) and followed up six months later  
278 (43), measuring QoL in HIV patients with VL (HIV-VL) and HIV patients. At baseline,  
279 HIV-VL patients had lower mean scores in all domains of the QoL questionnaire  
280 showing poor quality of life. Importantly depression was strongly and consistently  
281 associated with all the QoL domains in HIV-VL patients (as it was in the HIV group.  
282 The mean (SD) depressive-symptoms scale scores were higher 2.67 ( $\pm 0.7$ ) for HIV-VL  
283 patients compared to HIV patients 1.61 ( $\pm 0.5$ ) ( $p = 0.001$ ) (42). After 6 months of  
284 treatment with both antiretroviral treatment (ART) and anti-leishmanial drugs, the  
285 follow-up study (43), showed there was improvement in all the QoL domains analysed  
286 at baseline in both groups. Mean scores for social relationship among co-infected  
287 patients were significantly lower compared to the HIV group ( $p=0.001$ ).

288 Another study looked at knowledge attitudes and practices (KAP) about VL among  
289 adults in a community in India. It was found that 7.6% of the participants agreed with  
290 the statement that the incidence of VL in the family should not be disclosed. Forty-three  
291 percent reported that the illness affects mental health, causes stress (27%), irritation  
292 (3.7%), depression/fear of death (5.8%) and other (16,9%). Almost 74% thought that  
293 VL in the family has financial consequences, causes impoverishment. (39.5%) leading  
294 to the need for loans (17.6%), forced to sell property (0.7%) and other (15.5%) (46).



295

## 296 **Cutaneous leishmaniasis**

297 The cross-sectional study by Chahed et al, 2016, measured the QoL in girls and women  
298 with CL scars and explored the psychological and psychosocial consequences of CL  
299 using the Revised Illness Perception Questionnaire (IPQ-R), World Health Organization  
300 Quality of Life-26 (WHOQOL-26) and the Psoriasis Life Stress Inventory (PLSI) in 41  
301 girls and women with CL scars in the Sidi Bouzid region, Tunisia (44). The correlation  
302 analyses performed on inter and intra-subscales showed that the emotional  
303 representations associated with CL were correlated with a loss of self-esteem feelings of  
304 inferiority ( $r=0.77$ ,  $p<0.05$ ). The more patients knew about CL, the more pessimistic  
305 they got about the prospects of recovery. Patients who had a more coherent perception  
306 of CL had stronger emotional reactions ( $p<0.001$ ). Moderate correlations were found  
307 between the total number of body scars and experiences of rejection ( $r=0.31$ ,  $p<0.05$ ).  
308 The number of body scars had a strong link to experience with stigma. Experiences of  
309 rejection and avoidance of stress negatively correlated with age ( $r=-0.33$ ,  $p<0.05$ , and  
310  $r=-0.31$ ,  $p<0.05$ ), suggesting that younger women experience social stigma more than  
311 older women. The WHOQOL-26 and the PSLI questionnaire results showed that the  
312 domains of Social QoL and anticipation avoidance of stress, and social QoL and total  
313 stress correlated significantly ( $r=-0.36$ ,  $p<0.05$  and  $r=-0.32$ ,  $p<0.05$ ). The Mental QoL  
314 domains, however, did not correlate significantly with any of the PSLI domains.

315 QoL was measured using the Dermatology Life Quality Index (DLQI) in a cross-  
316 sectional study of 20 patients with CL (45). In 70% ( $n=14$ ), CL resulted in a moderate  
317 to large effect on QoL in the work and school domain, and the “symptoms and feelings”  
318 domain followed. The domain with the least impact was “personal relationships”.

319 Handjani and Kalafi, 2013 measured the impact of dermatological diseases on the  
320 quality of life of healthy families of patients with skin diseases which included five  
321 patients with CL using the 10-item validated Persian version of the Family Dermatology  
322 Life Quality Index (FDLQI) questionnaire (55). The FDLQI scores for each of the  
323 groups showed that there was no statistically significant difference in QoL of families  
324 found between the groups of different skin diseases studied (vitiligo, psoriasis,  
325 pemphigus and leishmaniasis). However, due to there only being 5 CL families in this  
326 study, there could be lack of statistical power.

327 The WHOQOL-BREF was used to study QoL, PM and MI of CL patients (48). The  
328 psychological and environment domains had the lowest median scores. Forty (90.9%)  
329 interviewees presented negative feelings (blue mood, anxiety, despair, depression). Of  
330 these, eight (18.18%) reported experiencing such feelings always, 19 (43.18%) very  
331 often, nine (20.45%) quite often, and four (9.09%) rarely. 50% were dissatisfied with  
332 the support received from family and friends, and in their intimate lives.

333 Layegh et al., 2017, measured the QoL, depression, and anxiety (MI) in children with  
334 CL using the Children's Dermatology Life Quality Index (CDLQI), Children's  
335 Depression Inventory (CDI), and State-Trait Anxiety Inventory for Children (STAIC)  
336 questionnaires (49). This study enrolled 42 children by convenience sampling. The  
337 prevalence of low quality of life, state anxiety, and trait anxiety was 57.1, 76.9, and  
338 15.8%, respectively; 32% of patients had depression. Cases of low quality of life  
339 (54.1%), state anxiety (56.6%), and trait anxiety (53.8%) were more common with the  
340 acute form of leishmaniasis. Low quality of life (70.83%), state anxiety (76.66%), trait  
341 anxiety (83.3%), and depression (84.6%) were more prevalent in females. The face was  
342 the most common location of involvement in patients with low quality of life (63.3%),  
343 state anxiety (70.4%), trait anxiety (83.3%), and depression (54.5%). However, the

344 authors report that no significant difference was found between psychological factors in  
345 patients and sex ( $p > 0.05$ ), acute or chronic type of disease ( $p > 0.05$ ), presence of any  
346 other skin or systemic diseases ( $p > 0.05$ ), location of lesions ( $p > 0.05$ ), number of  
347 lesions ( $p > 0.05$ ), and duration of involvement ( $p > 0.05$ ). No information is available  
348 about the statistical tests used. This communication was in the form of a conference  
349 abstract (49).

350 Simsek et al., 2008 conducted a cross-sectional study to assess mental health disorders  
351 in women in the region using the Structured Clinical Interview for DSM-IV Axis I  
352 Disorders (SCID-I).0.5) (51). Fifteen out of 270 women had cutaneous leishmaniasis  
353 (6.1%) of whom 8 (53.3%) had a mental disorder. Women with CL have a 2.13 higher  
354 OR (95% CI: 1.25-7.31) compared to women without CL of suffering from a mental  
355 disorder mainly depression and anxiety.

356 Turan et al., 2015 assessed the psychiatric morbidity and QoL in children and  
357 adolescents with CL and their parents using the Child Depression Inventory (CDI), the  
358 State-Trait Anxiety Inventories for Children (STAIC) and the Pediatric Quality of Life  
359 Inventory Parent and Child Versions (PedQL-P and C, respectively) (52). Fifty-four  
360 subjects, of mean age 12.0 ( $\pm 3.2$ ) years of whom 46.3% were female, were matched  
361 with 40 healthy controls of mean age 11.5 ( $\pm 2.3$ ) years, 50% of whom were female. In  
362 addition, the mother or other caregiver was included for each child. From 2011 to 2013,  
363 subjects were recruited at the paediatrics department of a hospital in Sanliurfa, Turkey  
364 and the controls were children receiving vaccinations or undergoing routine health  
365 checks, matched for age, gender, and parents' level of education. Scores for depression  
366 were higher in patients compared to the controls and QoL was lower in patients and  
367 their mothers. All results were statistically significant ( $p < 0.001$  for CDI and  $p < 0.05$  for

368 PedQL-P and PedQL-C). However no statistically significant difference in scores for  
369 anxiety (STAIC) was found.

370 Yanik et al., 2004 looked at the psychological impact of CL using the Hospital Anxiety  
371 Depression Scale (HAD), the Body Image Satisfaction Scale (BIS) and the  
372 Dermatology Quality of Life Scale (DQL) to measure anxiety, psychosocial morbidity  
373 and quality of life, respectively. Ninety-nine subjects in 3 equal groups, those with  
374 active lesions (n=33), patients with healed lesions (n=33) and a healthy group (n=33)  
375 were studied. Results showed that lesions on the face and hands, disease active for over  
376 a year, permanent scars and social stigmatisation led to anxiety and depression. Body  
377 image satisfaction and quality of life were also decreased. Higher scores were obtained  
378 in patients with active CL and scores were also statistically significant in patients with  
379 healed scars compared to controls in HAD and BIS. Patients with active lesions had  
380 lower QoL scores compared to those with healed scars. The correlations between the  
381 subscale of HAD and DQL showed a moderate correlation (anxiety  $r=0.490$ ,  $p < 0.001$ ;  
382 depression  $r=0.291$ ,  $p=0.040$ ). The comparison between the HAD scale and the BIS  
383 scale had a significant correlation (anxiety  $r=0.201$ ,  $p=0.047$ ; depression  $r=0.256$ ,  
384  $p=0.011$ ).

385 The quality of life in patients with CL using the Dermatology Quality of Life (DLQI)  
386 Index was carried out (53). QoL was significantly affected. Highest scores were seen in  
387 the symptoms and feelings domains; the lowest effect was observed in the treatment  
388 domain of the DLQI. The appearance of the lesion and type of the lesion significantly  
389 affected the QoL ( $p < 0.05$ ) as patients with ulcerated lesions had lower quality of life  
390 compared to those with nodular ( $P = 0.003$ ) and plaque lesions ( $P = 0.005$ ). The activity  
391 of the disease, location of the lesions and gender did not affect the scores significantly.

392 A scoping review on the impact of localised cutaneous leishmaniasis on psychosocial  
393 wellbeing has recently been conducted . Eight quantitative studies (44,51–55,57,58) five  
394 qualitative studies (6,9,11,59,60) and two mixed-methods (10,61) studies were included  
395 in their review. It combines the results of the quantitative studies through narrative  
396 synthesis looking at anxiety and depression, low QoL, stigma and fear of scars. The  
397 three last cited quantitative studies were picked up by us during the title screen but did  
398 not fulfil the abstract or full-article screen criteria for this review, and were thus  
399 excluded (refer to protocol for inclusion and exclusion criteria) (32).

400 Our set of inclusion criteria was different from that of the scoping review carried out by  
401 Bennis and colleagues (date), hence only six studies included in their study overlap with  
402 this systematic review (44,51–55). The quantitative study by Abazid et al., 2012 showed  
403 no mental health or psychosocial outcomes (57); An RCT was found that falls under  
404 our exclusion criteria (58). Qualitative studies were not included in our study.

405 Bennis et al., failed to pick up three studies on CL that were identified and included in  
406 this systematic review (45,48,49).

407

#### 408 **Post kala azar dermal leishmaniasis**

409 Pal et al., 2017 assessed the perceptions, stigma and quality of life in patients with  
410 PKDL patients compared to healthy controls using the Dermatology Life Quality Index  
411 (DLQI) and the 36-Item Short Form Health Survey (SF-36) (50). The type and severity  
412 of the lesions were also noted. A range of independent variables were compared. DLQI  
413 scores a significant effect on QoL in patients of PKDL with highest impairment found  
414 in patients under the age of 20 years ( $p = 0.03$ ) and with type of lesion, where patients  
415 with the more severe nodular lesions had poorer scores ( $p = 0.001$ ). Initiation of

416 treatment for PKDL improved the scores ( $p = 0.04$ ), while gender, duration and location  
417 of the lesions had no impact. The SF-36 showed that mental health, social functioning,  
418 body pain and general health were significantly different ( $p < 0.05$ ) in the patients  
419 compared to the control group.

420

#### 421 **Risk of Bias assessment**

422 Based on NOS, 6 of the 14 studies were of good quality, 3 were of fair quality and the  
423 remaining 4 were of poor quality (S4 Table). The fact that some studies were carried out  
424 in LMICs of lower economic status than others did not affect the quality outcome.  
425 Alemayehu et al 2017 and 2018 both showed the highest scores among all 14 articles,  
426 despite having been carried out in Ethiopia (42,43). Most studies with poor or fair  
427 scores were found to have inadequate sample sizes (too small) with no justification (44–  
428 49,53). In contrast, recruitment methods for subjects seemed to be justified for all  
429 studies. Out of the nine cross-sectional studies, only five (42,45,46,49,53) controlled for  
430 at least one confounder. Thus, the remaining four could be severely biased due to  
431 confounders such as the age or gender of the participants. Moreover, what contributed  
432 further to risk of bias was that five of the studies (45,47–49,53) did not report  
433 confidence intervals, which is considered inadequate statistical reporting. However,  
434 some important inconsistencies between the NOS and the adapted-NOS, as well as the  
435 different study designs, could potentially have had an impact on the overall score and  
436 quality rating. The maximum rating that can be given in the adapted NOS-version is 10  
437 stars whereas for the original NOS versions (cohort and case-control studies) Quality  
438 rating (S4 Table) does not take into account the overall star rating, but rather the rating  
439 per section: “selection”, “comparability” and “exposure”. The comparability section

440 was always assessed in terms of whether the study controlled for specific confounding  
441 variables. Gender and age were considered the most important variables to control for.

442

443 The ROBIS (S5-S8 Tables) assessment showed that in the review by Bennis et al 2018  
444 the risk of bias is unclear overall. As shown in the assessment, the lack of a previously  
445 published protocol made it very difficult to assess the reliability of the review.

446

447

## 448 **DISCUSSION**

449 The primary research question of this review was: *What is the impact of leishmaniasis*  
450 *on mental health and psychosocial wellbeing?* This systematic review shows  
451 preliminary evidence of associations between leishmaniasis and mental health, but also  
452 shows several lacunae in the evidence. The systematic review only yielded studies about  
453 VL, PKDL and CL. The first evident large gap in the existing literature is the lack of  
454 quantitative observational studies on the impact of mucocutaneous leishmaniasis on  
455 mental health. All 14 studies found examined at least one of the mental health outcomes  
456 (QoL, PM or MI). Of these studies: nine found significant associations between  
457 leishmaniasis and QoL; seven found significant associations with MI; and six with PM.

458 Several of the included papers appear to show an association between all forms of  
459 leishmaniasis and depression (42,43,46,49,51,52,54). Mechanisms for this are likely to  
460 be complex and interwoven as with other NTDs (62) but evidence to date suggests that  
461 scarring in CL has an increased association with social and family rejection (44) and  
462 anxiety/depression (54) and severe nodular lesions also carry an association with

463 depression (50). The effect may be more severe in younger patients and women/girls  
464 although this needs to be investigated further. Lesions on the face have an increased  
465 association with anxiety/ depression (49,54). Evidence for a societal link was found  
466 between VL and mental health outcomes (MI, QoL, PM). Survey work assessing the  
467 perceptions and attitudes of the community in Bihar, India, found that there is social  
468 stigma attached to VL, as well as PM MI, and decrease in QoL due to financial loss  
469 (46). While this supports the hypothesis that financial burden may also lead to  
470 decreased mental well-being, our study did not find more evidence associating VL with  
471 financial problems and social drift. A more complete study would involve economic  
472 evaluations to be part of our inclusion criteria and require different search terms.

473 When looking at subtypes of leishmaniasis more specifically, there are several gaps in  
474 the literature concerning the effect of VL on mental health outcomes, despite it having  
475 been shown that VL did decrease the quality of life of patients directly (42,43). We  
476 found no evidence that neuroinflammation or inflammatory responses play a role in the  
477 development of mental health problems associated with leishmaniasis as this had not  
478 been specifically explored in this population. This is a surprising gap in the literature  
479 given that inflammation associated with other diseases has been shown to be associated  
480 with mental health (in a bidirectional manner), although these reported diseases and  
481 syndromes are all chronic (63–65). Neurological manifestations can occur in VL  
482 (12,66), which can both decrease quality of life and increase the likelihood of mental  
483 illness in Leishmaniasis. Only one review (non-systematic) looks at the neurological  
484 and psychological consequences of visceral leishmaniasis in humans and animals (67)  
485 but the only article that documents mental health outcomes in human VL patients was  
486 an article published by Carswell in 1953 (68) which did not meet our inclusion criteria  
487 and included no validated assessments of mental health outcomes.



488 The subject of stigma in VL was only examined indirectly in a single study from the 14  
489 included studies. This showed a reluctance in the community to report the occurrence of  
490 the disease, indicating fear of the negative consequences this would have upon the  
491 patient and their families (46).

492 The association of VL and MI was, however, indirectly examined (46), where 43% of  
493 the community perceived that VL could cause changes in mental health, although no  
494 patient outcomes were reported. The prospective longitudinal study from Ethiopia  
495 addressed the question partly because it was related to HIV-VL co-infected patients  
496 (42,43) and not just VL infection. This study reported a higher mean score for  
497 depressive-symptoms compared to HIV-patients alone. However, it would be  
498 speculative to conclude that this was due to VL alone and it is possible that any other  
499 co-morbidity could exacerbate the symptoms of MI. Carswell reported "mental  
500 depression" and "apathy" in all of 96 (100%) patients of VL (68), but no clinical or  
501 diagnostic measures were used and these findings have therefore not been tested in  
502 more methodologically robust research using validated tools to assess MI, QoL or PM.

503 Bennis et al., 2018 focuses on the stigmatising impact that localised cutaneous  
504 leishmaniasis can have, by dividing "stigma" into the categories of social stigma (when  
505 society rejects or excludes against people even if the stigmatized disagree with the way  
506 they are being treated) and self-stigma (the internalised mechanism within the person  
507 who is being stigmatized who faces rejection in an anticipatory manner) (41). Even  
508 though Pal et al 2017 do find a significant decrease in quality of life in the personal  
509 relationship domain (50), one cannot jump to conclusions about whether this was  
510 related to stigma, and whether PKDL patients suffered from MI. CL patients are victim  
511 to social stigma, self-stigma and suffer from PM, MI and decreased QoL (44,51,52,54).  
512 In Chahed et al., 2016, the number of body scars was weakly correlated to an experience

513 of stigma ( $p=0.06$ ,  $r=0.29$ ). They also observed anticipation avoidance of stress,  
514 indicating not only social stigma but also self-stigma (44). These results should be  
515 interpreted with caution, because the sample size was small ( $n=41$ ). The study showed  
516 stronger correlations between CL and loss of self-esteem and feelings of inferiority  
517 ( $r=0.77$ ,  $p<0.05$ ), and it was shown that at younger ages, women experienced higher  
518 levels of rejection and avoidance of stress (44). Bennis' review included and reported on  
519 the results of qualitative studies (not included in the study design for this systematic  
520 review) showing: social isolation; social contempt; social exclusion; marriage  
521 difficulties; embarrassment; shame; sadness; disgust; shyness; and decreased marriage  
522 prospects (41). The scoping review concludes that stigma is closely linked to  
523 psychosocial morbidity (41).

524 Although PKDL and CL are caused by different *Leishmania* species, both have visible  
525 and disfiguring clinical manifestations. Stigma was found to play an important role in  
526 the mental health outcomes associated with CL and PKDL but the measurement tools  
527 used in the quantitative observational studies (part of inclusion criteria) could not  
528 quantify how much stigma a person or their family faces. Bennis et al., 2018 call for the  
529 development of a standardized tool to measure stigma (41). Stigma, feelings of rejection  
530 and social exclusion are a few of the social consequences of CL and PKDL that are  
531 much more easily studied in a qualitative setting, e.g. in focus groups or individually  
532 using non-structured open-ended questionnaires as was the case with (10,11,69).  
533 Overall, the clinical manifestations for PKDL and CL both led to decreased body  
534 satisfaction as well as misconceptions within society about potential disease spread.  
535 These findings complement those of Bailey et al, in their recent systematic review of the  
536 psychosocial impact of CL. They used the data from qualitative and quantitative studies  
537 to demonstrate a high burden of co-morbid depression in both active and inactive forms

538 of the disease (70).

539 The only studies including a co-morbidity were part of the same study assessed at  
540 baseline (cross-sectional) (42) (prospective cohort) (43) where the impact of VL as a  
541 comorbidity of HIV was assessed pre- and post-treatment with anti-parasitic treatment  
542 for leishmaniasis. The baseline study shows that HIV-VL patients showed significantly  
543 worse quality of life scores in all domains compared to the HIV-alone patients  
544 ( $p=0.001$ )(42). Regarding psychosocial morbidity and mental illness, the Kessler  
545 Psychological Distress Scale correlated significantly with psychological health, social  
546 relation, and environmental domains of the WHOQoL had correlation coefficients of -  
547 0.335, -0.295, and -0.350 with the Kessler scale ( $p=0.001$ ), further showing that a  
548 decrease in quality of life correlates with an increased mean psychological distress  
549 score. The mean (SD) depressive symptoms scale score was higher in HIV-VL patients  
550 compared to HIV patients, 2.67 ( $\pm 0.7$ ) vs 1.161 ( $\pm 0.5$ ) respectively (42). After therapy,  
551 at the 6-month follow-up stage (43), HIV-only patients showed no significantly  
552 different QoL scores compared to HIV-VL patients, showing that QoL of life scores  
553 improve after the disease is treated. Usually patients return to their normal physical  
554 appearance, as opposed to the other forms of leishmaniasis. This is starkly different in  
555 comparison to people who have CL and PKDL lesions. When the cutaneous lesions are  
556 healed, these become visible, disfiguring scars on the patient. Studies have shown that  
557 the suffering is long-term with the consequences of the disease for life (50,51,54).

558 We used the results of the review to develop a conceptual framework (Figure 1)  
559 outlining the relationships visually between the forms of leishmaniasis, mental illness,  
560 psychosocial morbidity and quality of life. This shows the strength of evidence or the  
561 absence of evidence where there are hypothesised links. This takes the form of a model  
562 that may help to direct future research and public health policy.

563 **Fig 1. Conceptual Framework.**

564 Theoretical model linking leishmaniasis to decreased quality of life, mental illness and psychosocial  
565 morbidity. Continuous blue arrows show links that were confirmed in the included studies, dotted blue  
566 arrows show links that have been established in the literature but were not mentioned in our included  
567 studies, and red arrows show theoretical links that were hypothesized for this systematic review but not  
568 confirmed in the literature.

569

570 **Limitations**

571

572 The variability in outcome measures and study designs contributed to large inter-study  
573 heterogeneity. Therefore, a narrative description of the results was the only option. Even  
574 if the outcome measures had been more consistent or if more papers had been identified,  
575 the lack of consistent good quality studies, would have hindered the conduct and  
576 interpretation of any meta-analysis. This highlights the need for better literature in this  
577 area. The searches and inclusion criteria for this review did not include qualitative  
578 studies which could also have revealed useful information regarding the studied  
579 outcomes.

580 **Future research**

581 Further research is recommended with larger sample sizes. Research should include  
582 both mixed-methods and qualitative methods, as it is only through combining  
583 quantitative and qualitative measures of mental health outcomes that we will begin to  
584 understand the dimensions of the problem at hand.

585 There has been no research to follow-up on Carswell's observation in 1953 (68), that  
586 most patients with VL showed marked signs of depression. Thus, a more sophisticated,  
587 and modern large cross-sectional study with VL patients to study if there is associated  
588 mental illness in these patients would be an important aspect to investigate. This  
589 research needs to be designed in culturally appropriate ways given the variety of low-  
590 and middle-income country settings that the disease is to be found.

591

## 592 **Clinical and Policy Implications**

593 Governments of endemic countries could invest more in research to find out exactly  
594 what is the best way to intervene with the CL and PKDL mental health crisis at hand.

595 There is evidence that stigma is a serious problem associated with leishmaniasis and  
596 that for this reason policies addressing informational gaps and misinformation may be  
597 productive. Women and children were found to be impaired significantly in these  
598 studies. Women's health is of paramount importance in public health. There is a need  
599 for effective promotion of good mental health for women and children. Hence good  
600 quality evidence-based research and practice would add considerably to this field.

601 In the LMIC settings, where VL is endemic, there is very little investment in mental  
602 health. If VL has a causative link with depression it may be going undiagnosed. If so,  
603 this could (after treatment) have a detrimental impact on the patients' quality of life, and  
604 wider societal and economic impacts.

605

## 606 **CONCLUSION**

607 This wide exploratory systematic review has shown that there are substantial gaps in our  
608 knowledge and in the research literature and that there is a lack of methodological  
609 quality in many of the existing studies. This systematic review shows preliminary  
610 evidence that leishmaniasis impacts upon individuals and families affecting their social  
611 status, causing stigma, with effects on quality of life and raising the risk of mental  
612 health problems. This work allows us to build a preliminary model that we present here  
613 to scaffold future attempts to better understand the effects of leishmaniasis on MI, PM  
614 and QoL.

615

616 **ACKNOWLEDGEMENTS**

617 No funding was used to conduct this systematic review by MP, VM, BW or RC.

618 PK is supported by a Wellcome Trust Senior Investigator Award (WT1063203;

619 <https://wellcome.ac.uk>) and MRC Global Challenges Research Fund Foundation Award

620 (MR/P024661/1; <https://www.ukri.org/research/global-challenges-research-fund/>).

621

622 **Conflicts of Interest**

623 The authors declare no conflicts of interest.

624

## 626 REFERENCES

- 627 1. Desjeux P, Jannin J, Bern C, Boer M den, Alvar J, Herrero M, et al. Leishmaniasis Worldwide and Global Estimates of Its  
628 Incidence. *PLoS One* [Internet]. Public Library of Science; 2012 May 31;7(5):e35671. Available from:  
629 <https://doi.org/10.1371/journal.pone.0035671>
- 630 2. Bhattacharya SK, Dash AP. Elimination of kala-azar from the Southeast Asia Region. *Am J Trop Med Hyg.*  
631 2017;96(4):802–4.
- 632 3. WHO- World Health Organization. Fact Sheets- Leishmaniasis [Internet]. 2019 [cited 2019 Apr 18]. Available from:  
633 <https://www.who.int/en/news-room/fact-sheets/detail/leishmaniasis>
- 634 4. Zijlstra EE, Musa AM, Khalil EAG, El Hassan IM, El-Hassan AM. Post-kala-azar dermal leishmaniasis. *Lancet Infect*  
635 *Dis.* 2003;3(2):87–98.
- 636 5. Handler MZ, Patel PA, Kapila R, Al-Qubati Y, Schwartz RA. Cutaneous and mucocutaneous leishmaniasis: Clinical  
637 perspectives. *J Am Acad Dermatol.* 2015;73(6):897–908.
- 638 6. Kassi M, Kassi M, Afghan AK, Rehman R, Kasi PM. Marring leishmaniasis: The stigmatization and the impact of  
639 cutaneous leishmaniasis in Pakistan and Afghanistan. *PLoS Negl Trop Dis.* 2008;2(10):1–3.
- 640 7. Afghan AK, Kassi M, Kasi PM, Ayub A, Kakar N, Marri SM. Clinical manifestations and distribution of cutaneous  
641 leishmaniasis in Pakistan. *J Trop Med.* 2011;2011:359145.
- 642 8. Al-Kamel MA. Impact of leishmaniasis in women: a practical review with an update on my ISD-supported initiative to  
643 combat leishmaniasis in Yemen (ELYP). *International Journal of Women’s Dermatology.* 2016.
- 644 9. Al-Kamel MA. Impact of leishmaniasis in women: a practical review with an update on my ISD-supported initiative to  
645 combat leishmaniasis in Yemen (ELYP). *Int J Women’s Dermatology.* 2016;93–101.
- 646 10. Reithinger R, Aadil K, Kolaczinski J, Mohsen M, Hami S. Social impact of leishmaniasis Afghanistan. *Emerg Infect Dis.*  
647 2005;11(4):634–6.
- 648 11. Bennis I, Belaid L, De Brouwere V, Filali H, Sahibi H, Boelaert M. “The mosquitoes that destroy your face”. Social  
649 impact of Cutaneous Leishmaniasis in South-eastern Morocco, A qualitative study. *PLoS One.* 2017;12(12):e0189906.
- 650 12. Hashim FA, Ahmed AE, El Hassan M, El Mubarak MH, Yagi H, Ibrahim EN, et al. Neurologic changes in visceral  
651 leishmaniasis. *Am J Trop Med Hyg.* 1995;52(2):149–54.
- 652 13. Diniz LMO, Duani H, Freitas CR, Figueiredo RM, Xavier CC. Neurological involvement in visceral leishmaniasis: case  
653 report. *Rev Soc Bras Med Trop.* 2010;43:743–5.
- 654 14. Chungue CN, Gachihi G, Muigai R. Is neurological involvement possible in visceral leishmaniasis in kenya? *Trans R Soc*  
655 *Trop Med Hyg.* 1985;79(6):872.
- 656 15. Prasad LSN, Sen S. Migration of *Leishmania donovani* amastigotes in the cerebrospinal fluid. *Am J Trop Med Hyg.*  
657 1996;55(6):652–4.
- 658 16. Fasanaro A, Scoleri G, Pizza V, Gaeta G, Fasanaro A. Guillain-Barré syndrome as presenting manifestation of visceral  
659 leishmaniasis. *Lancet.* 1991;333(8775):1142.
- 660 17. Kumar N, Pandey K, Das VNR, Sinha PK, Topno RK, Lal CS, et al. HIV infection, visceral leishmaniasis and Guillain-  
661 Barre syndrome in the same patient: a case report. *Ann Trop Med Parasitol.* 2008;102:185–8.
- 662 18. Attarian S, Serratrice J, Mazodier C, Disdier P, Azulay JP, Pouget J. [Guillain-Barre syndrome revealing visceral  
663 leishmaniasis in an immunocompetent woman]. *Rev Neurol.* 2003;159(11):1046–8.
- 664 19. Melo GD, Silva JES, Grano FG, Souza MS, Machado GF. Leishmania infection and neuroinflammation: Specific  
665 chemokine profile and absence of parasites in the brain of naturally-infected dogs. *J Neuroimmunol.* 2015;289:21–9.

- 666 20. Melo GD, Goyard S, Fiette L, Boissonnas A, Combadiere C, Machado GF, et al. Unveiling Cerebral Leishmaniasis:  
667 Parasites and brain inflammation in *Leishmania donovani* infected mice. *Sci Rep*. 2017;7(1):1–13.
- 668 21. Singhal G, Jaehne EJ, Corrigan F, Toben C, Baune BT. Inflammasomes in neuroinflammation and changes in brain  
669 function: A focused review. *Front Neurosci*. 2014;8(315):1–13.
- 670 22. Stewart JC, Rand KL, Muldoon MF, Kamarck TW. A prospective evaluation of the directionality of the depression-  
671 inflammation relationship. *Brain Behav Immun*. 2009;23(7):936–44.
- 672 23. Taraz M, Khatami MR, Gharekhani A, Abdollahi A, Khalili H, Dashti-Khavidaki S. Relationship between a pro- and anti-  
673 inflammatory cytokine imbalance and depression in haemodialysis patients. *Eur Cytokine Netw*. 2012;23(4):179–86.
- 674 24. Oliveira Miranda D, Soares De Lima TA, Ribeiro Azevedo L, Feres O, Ribeiro Da Rocha JJ, Pereira-Da-Silva G.  
675 Proinflammatory Cytokines Correlate with Depression and Anxiety in Colorectal Cancer Patients. *Biomed Res Int*.  
676 2014;2014:1–5.
- 677 25. Ford DE, Erlinger TP. Depression and C-Reactive Protein in US Adults: Data from the Third National Health and  
678 Nutrition Examination Survey. *Arch Intern Med*. 2004;164(9):1010–4.
- 679 26. Vogelzangs N, de Jonge P, Smit JH, Bahn S, Penninx BW. Cytokine production capacity in depression and anxiety.  
680 *Transl Psychiatry*. 2016;6(5):e825.
- 681 27. Furtado M, Katzman MA. Examining the role of neuroinflammation in major depression. *Psychiatry Res*. 2015;229(1–  
682 2):27–36.
- 683 28. Howren MB, Lamkin DM, Suls J. Associations of depression with c-reactive protein, IL-1, and IL-6: A meta-analysis.  
684 *Psychosom Med*. 2009;71(2):171–86.
- 685 29. Dowlati Y, Herrmann N, Swardfager W, Liu H, Sham L, Reim EK, et al. A Meta-Analysis of Cytokines in Major  
686 Depression. *Biol Psychiatry*. 2010;67(5):446–57.
- 687 30. Alesci S, Martinez PE, Kelkar S, Ilias I, Ronsaville DS, Listwak SJ, et al. Major depression is associated with significant  
688 diurnal elevations in plasma interleukin-6 levels, a shift of its circadian rhythm, and loss of physiological complexity in its  
689 secretion: Clinical implications. *J Clin Endocrinol Metab*. 2005;90(5):2522–30.
- 690 31. Berk M, Williams LJ, Jacka FN, O’Neil A, Pasco JA, Moylan S, et al. So depression is an inflammatory disease, but  
691 where does the inflammation come from? *BMC Med*. 2013;11(1).
- 692 32. Pires M, Dunn-Roberts A, Churchill R, Wright B, Kaye P. The impact of leishmaniasis on mental health: a systematic  
693 review [Internet]. PROSPERO: CRD42018104369. 2018. Available from:  
694 [https://www.crd.york.ac.uk/prospéro/display\\_record.php?RecordID=104369](https://www.crd.york.ac.uk/prospéro/display_record.php?RecordID=104369)
- 695 33. CRD. Centre for Reviews and Dissemination - Systematic Reviews: CRD’s Guidance for Undertaking Systematic  
696 Reviews in Health Care. York Cent Rev Dissem. 2009;
- 697 34. Moher D, Liberati A, Tetzlaff J, Altman DG, Altman D, Antes G, et al. Preferred reporting items for systematic reviews  
698 and meta-analyses: The PRISMA statement (Chinese edition). *J Chinese Integr Med*. 2009;6(7):e1000097.
- 699 35. Weiss MG. Stigma and the Social Burden of Neglected Tropical Diseases. *PLoS Negl Trop Dis*. 2008;2(5):e237.
- 700 36. Meheus F, Abuzaid AA, Baltussen R, Younis BM, Balasegaram M, Khalil EAG, et al. The economic burden of visceral  
701 leishmaniasis in Sudan: An assessment of provider and household costs. *Am J Trop Med Hyg*. 2013;89(6):1146–53.
- 702 37. Wells G, Shea B, O’Connell D, Peterson J, Welch V, Losos M, et al. The Newcastle-Ottawa Scale (NOS) for assessing the  
703 quality of nonrandomised studies in meta-analyses [Internet]. 2012 [cited 2018 Aug 28]. Available from:  
704 [http://www.ohri.ca/programs/clinical\\_epidemiology/oxford.asp](http://www.ohri.ca/programs/clinical_epidemiology/oxford.asp)
- 705 38. Higgins JP, Green S. *Cochrane Handbook for Systematic Reviews of Interventions*: Cochrane Book Series. Cochrane



- 706 Handbook for Systematic Reviews of Interventions: Cochrane Book Series. 2008. 1-649 p.
- 707 39. Modesti PA, Reboldi G, Cappuccio FP, Agyemang C, Remuzzi G, Rapi S, et al. Panethnic Differences in Blood Pressure  
708 in Europe: A Systematic Review and Meta-Analysis. *PLoS One*. 2016;11(1):e0147601.
- 709 40. Whiting P, Savovic J, Higgins JP, Caldwell DM, Reeves BC, Shea B, et al. ROBIS: A new tool to assess risk of bias in  
710 systematic reviews was developed. *J Clin Epidemiol*. 2016;69:225–34.
- 711 41. Bennis I, De Brouwere V, Belrhiti Z, Sahibi H, Boelaert M. Psychosocial burden of localised cutaneous Leishmaniasis: A  
712 scoping review. *BMC Public Health*. 2018;18(358).
- 713 42. Alemayehu M, Wubshet M, Mesfin N, Tamiru A, Gebayehu A. Health-related quality of life of HIV infected adults with  
714 and without Visceral Leishmaniasis in Northwest Ethiopia. *Health Qual Life Outcomes*. 2017;15(1).
- 715 43. Alemayehu M, Wubshet M, Mes N, Gebayehu A. Effect of Health Care on Quality of Life among Human Immunode fi  
716 ciency Virus Infected Adults With and Without Visceral Leishmaniasis in northwest Ethiopia : A Longitudinal Follow-Up  
717 Study. 2018;98(3):747–52.
- 718 44. Chahed MK, Bellali H, Ben Jemaa S, Bellaj T. Psychological and Psychosocial Consequences of Zoonotic Cutaneous  
719 Leishmaniasis among Women in Tunisia: Preliminary Findings from an Exploratory Study. *PLoS Negl Trop Dis*.  
720 2016;10(10).
- 721 45. de Castro Toledo AC, da Silva RE, Carmo RF, Amaral TA, Profeta Luz Z lia M, Rabello A. Assessment of the quality of  
722 life of patients with cutaneous leishmaniasis in belo Horizonte, Brazil, 2009-2010. A pilot study. *Trans R Soc Trop Med*  
723 *Hyg*. 2013;107(5):335–6.
- 724 46. Govil D, Pedgaonkar SP, Chandra Das K, Sahoo H, Lhungdim H. Assessing Knowledge, Preventive Attitudes, and  
725 Practices Related to Kala-Azar: A Study of Rural Madhepura, Bihar, India. *Am J Trop Med Hyg* [Internet].  
726 2017;98(3):857–63. Available from: <http://www.ajtmh.org/content/journals/10.4269/ajtmh.16-0978>
- 727 47. Handjani F., Kalafi A. b. Impact of dermatological diseases on family members of the patients using family dermatology  
728 life quality index: A preliminary study in Iran. *Iran J Dermatology* [Internet]. 2013;16(66):128–31. Available from:  
729 [https://www.scopus.com/inward/record.uri?eid=2-s2.0-](https://www.scopus.com/inward/record.uri?eid=2-s2.0-84899700819&partnerID=40&md5=21b1205693d003a48c23f993c5fa7e41)  
730 [84899700819&partnerID=40&md5=21b1205693d003a48c23f993c5fa7e41](https://www.scopus.com/inward/record.uri?eid=2-s2.0-84899700819&partnerID=40&md5=21b1205693d003a48c23f993c5fa7e41)
- 731 48. Honório I de M, Cossul MU, Bampi LN da S, Baraldi S. Quality of Life in People with Cutaneous Leishmaniasis. *Rev*  
732 *Bras Promoç Saúde*. 2016;29(3):342–9.
- 733 49. Layegh P, Teimourian M, Shiva F, Hebrani P, Momenzadeh A. Quality of life, anxiety and depression in children with  
734 cutaneous leishmaniasis: Major concerns or not? *Pediatr Dermatol*. 2017;34:S152–3.
- 735 50. Pal B, Murti K, Siddiqui NA, Das P, Lal CS, Babu R, et al. Assessment of quality of life in patients with post kalaazar  
736 dermal leishmaniasis. *Health Qual Life Outcomes*. *Health and Quality of Life Outcomes*; 2017;15(1):1–7.
- 737 51. Simsek Z, Ak D, Altindag A, Gunes M. Prevalence and predictors of mental disorders among women in Sanliurfa,  
738 Southeastern Turkey. *J Public Health (Bangkok)* [Internet]. 2008;30(4):487–93. Available from:  
739 <https://academic.oup.com/jpubhealth/article-lookup/doi/10.1093/pubmed/fdn025>
- 740 52. Turan E, Kandemir H, Yesilova Y, Ekinçi S, Tanrikulu O, Kandemir SB, et al. Assessment of psychiatric morbidity and  
741 quality of life in children and adolescents with cutaneous leishmaniasis and their parents. *Postep dermatologii i Alergol*.  
742 2015;32(5):344–8.
- 743 53. Vares B, Mohseni M, Heshmatkhan A, Farjzadeh S, Safizadeh H, Shamsi-Meymandi S, et al. Quality of Life in Patients  
744 with Cutaneous Leishmaniasis. *Arch Iran Med*. 2013;16(8):474–7.
- 745 54. Yanik M, Gurel MS, Simsek Z, Kati M. The psychological impact of cutaneous leishmaniasis. *Clin Exp Dermatol*.  
746 2004;29(5):464–7.

- 747 55. Handjani F., Kalafi A. b. Impact of dermatological diseases on family members of the patients using family dermatology  
748 life quality index: A preliminary study in Iran. *Iran J Dermatology*. 2013;16(66):128–31.
- 749 56. The World Bank. Data for Upper middle income, Lower middle income, Low income [Internet]. 2016 [cited 2018 Sep 7].  
750 Available from: <https://data.worldbank.org/?locations=XT-XN-XM>
- 751 57. Abazid N, Jones C, Davies CR. Knowledge, attitudes and practices about leishmaniasis among cutaneous leishmaniasis  
752 patients in Aleppo, Syrian Arab Republic. *East Mediterr Health J* [Internet]. 2012;18(1):7–14. Available from:  
753 <http://www.ncbi.nlm.nih.gov/pubmed/22360005>
- 754 58. Nilforoushzadeh MA, Roohafza HR, Jaffary F, Khatuni M. Comparison of quality of life in women suffering from  
755 cutaneous leishmaniasis treated with topical and systemic glucantime along with psychiatric consultation compared with  
756 the group without psychiatric consultation. *J Isfahan Med Sch*. 2012;29(173):3046–52.
- 757 59. Ramdas S, van der Geest S, Schallig HDFH. Nuancing stigma through ethnography: The case of cutaneous leishmaniasis  
758 in Suriname. *Soc Sci Med*. 2016;151:139–46.
- 759 60. Reyburn H, Koggel M, Sharifi A. Social and psychological consequences of cutaneous leishmaniasis in Kabul  
760 Afghanistan [Internet]. *Heal Int Partnersh with Nor Church Aid*. 2000. Available from:  
761 [http://www.afghandata.org:8080/xmlui/bitstream/handle/azu/4484/azu\\_acku\\_pamphlet\\_ra644\\_125\\_r493\\_2000\\_w.pdf?seq](http://www.afghandata.org:8080/xmlui/bitstream/handle/azu/4484/azu_acku_pamphlet_ra644_125_r493_2000_w.pdf?sequence=1&isAllowed=y)  
762 [uence=1&isAllowed=y](http://www.afghandata.org:8080/xmlui/bitstream/handle/azu/4484/azu_acku_pamphlet_ra644_125_r493_2000_w.pdf?sequence=1&isAllowed=y)
- 763 61. Fernando SD, Siriwardana HVYD, Guneratne K a. RCW, Rajapaksa LC. Some sociological aspects of cutaneous  
764 leishmaniasis in patients attending a tertiary referral centre in Colombo, Sri Lanka. *Int Health*. 2010;2(1):69–74.
- 765 62. Hofstraat K, van Brakel WH. Social stigma towards neglected tropical diseases: a systematic review. *Int Health*.  
766 2016;8(suppl 1):i53–i70.
- 767 63. Nordin K, Pählman L, Larsson K, Sundberg-Hjelm M, Löf L. Health-related quality of life and psychological distress in  
768 a population-based sample of Swedish patients with inflammatory bowel disease. *Scand J Gastroenterol*. 2002;37(4):450–  
769 7.
- 770 64. Halaris A. Inflammation, Heart Disease, and Depression. *Curr Psychiatry Rep*. 2013;15(400).
- 771 65. Faugere M, Micoulaud-Franchi JA, Faget-Agius C, Lançon C, Cermolacce M, Richieri R. Quality of life is associated  
772 with chronic inflammation in depression: A cross-sectional study. *J Affect Disord*. 2017;227(April 2017):494–7.
- 773 66. Hussein A, MalkAldar M, Hajnoor K, Sidig A, Mohamed El-hadi H. Neurological manifestations of visceral  
774 leishmaniasis among lladult sudanese patients. *J Neurol Sci*. 2017;381:607.
- 775 67. Petersen CA, Greenlee MHW. Neurologic manifestations of *Leishmania* spp. infection. *J Neuroparasit*. 2011;2:N110401.
- 776 68. Carswell J. Kala-azar at Kitui. *East Afr Med J*. 1953;30(7):287–93.
- 777 69. Magalhaes HM, Costa JM, Costa RM, Franca F, Vale KC, Marsden P, et al. Information-related changes in attitude to  
778 mucocutaneous leishmaniasis of a population from an endemic region of the south of Bahia. *Rev Soc Bras Med Trop*.  
779 1990;23(1):49–52.
- 780 70. Bailey F, Mondragon-Shem K, Haines LR, Olabi A, Alorfi A, Ruiz-Postigo JA, et al. Cutaneous leishmaniasis and co-  
781 morbid major depressive disorder: A systematic review with burden estimates. *PLoS Negl Trop Dis*. 2019;

782

783

784

785

786 **Captions for Supplementary Tables**

787

788 S1 PRISMA Checklist

789 S2 PRISMA Flow Diagram.

790 After deduplication of identified records, 12417 titles of records were screened. Out of 362 Abstracts that

791 conformed to the inclusion criteria, 45 full articles were assessed for eligibility. 14 final articles were

792 selected for analysis.

793 S3 Search Strategies

794 S4 Table 1- Newcastle Ottawa Scale

795 S5 Table -ROBIS Phase 1 Assessing Relevance

796 S6 Table- ROBIS Phase 2 Identifying concerns about bias in the review process

797 S7 Table- ROBIS Phase 3: Judging Risk of Bias

798 S8 Table- ROBIS Phase 4: Risk of Bias in the Review

**Determinants of Health for Leishmaniasis:**  
**Poverty, Low SES, HIV,**  
**Warmer Climates**

Disease  
 Subtypes  
 Clinical Manifestations  
 Effects on patients

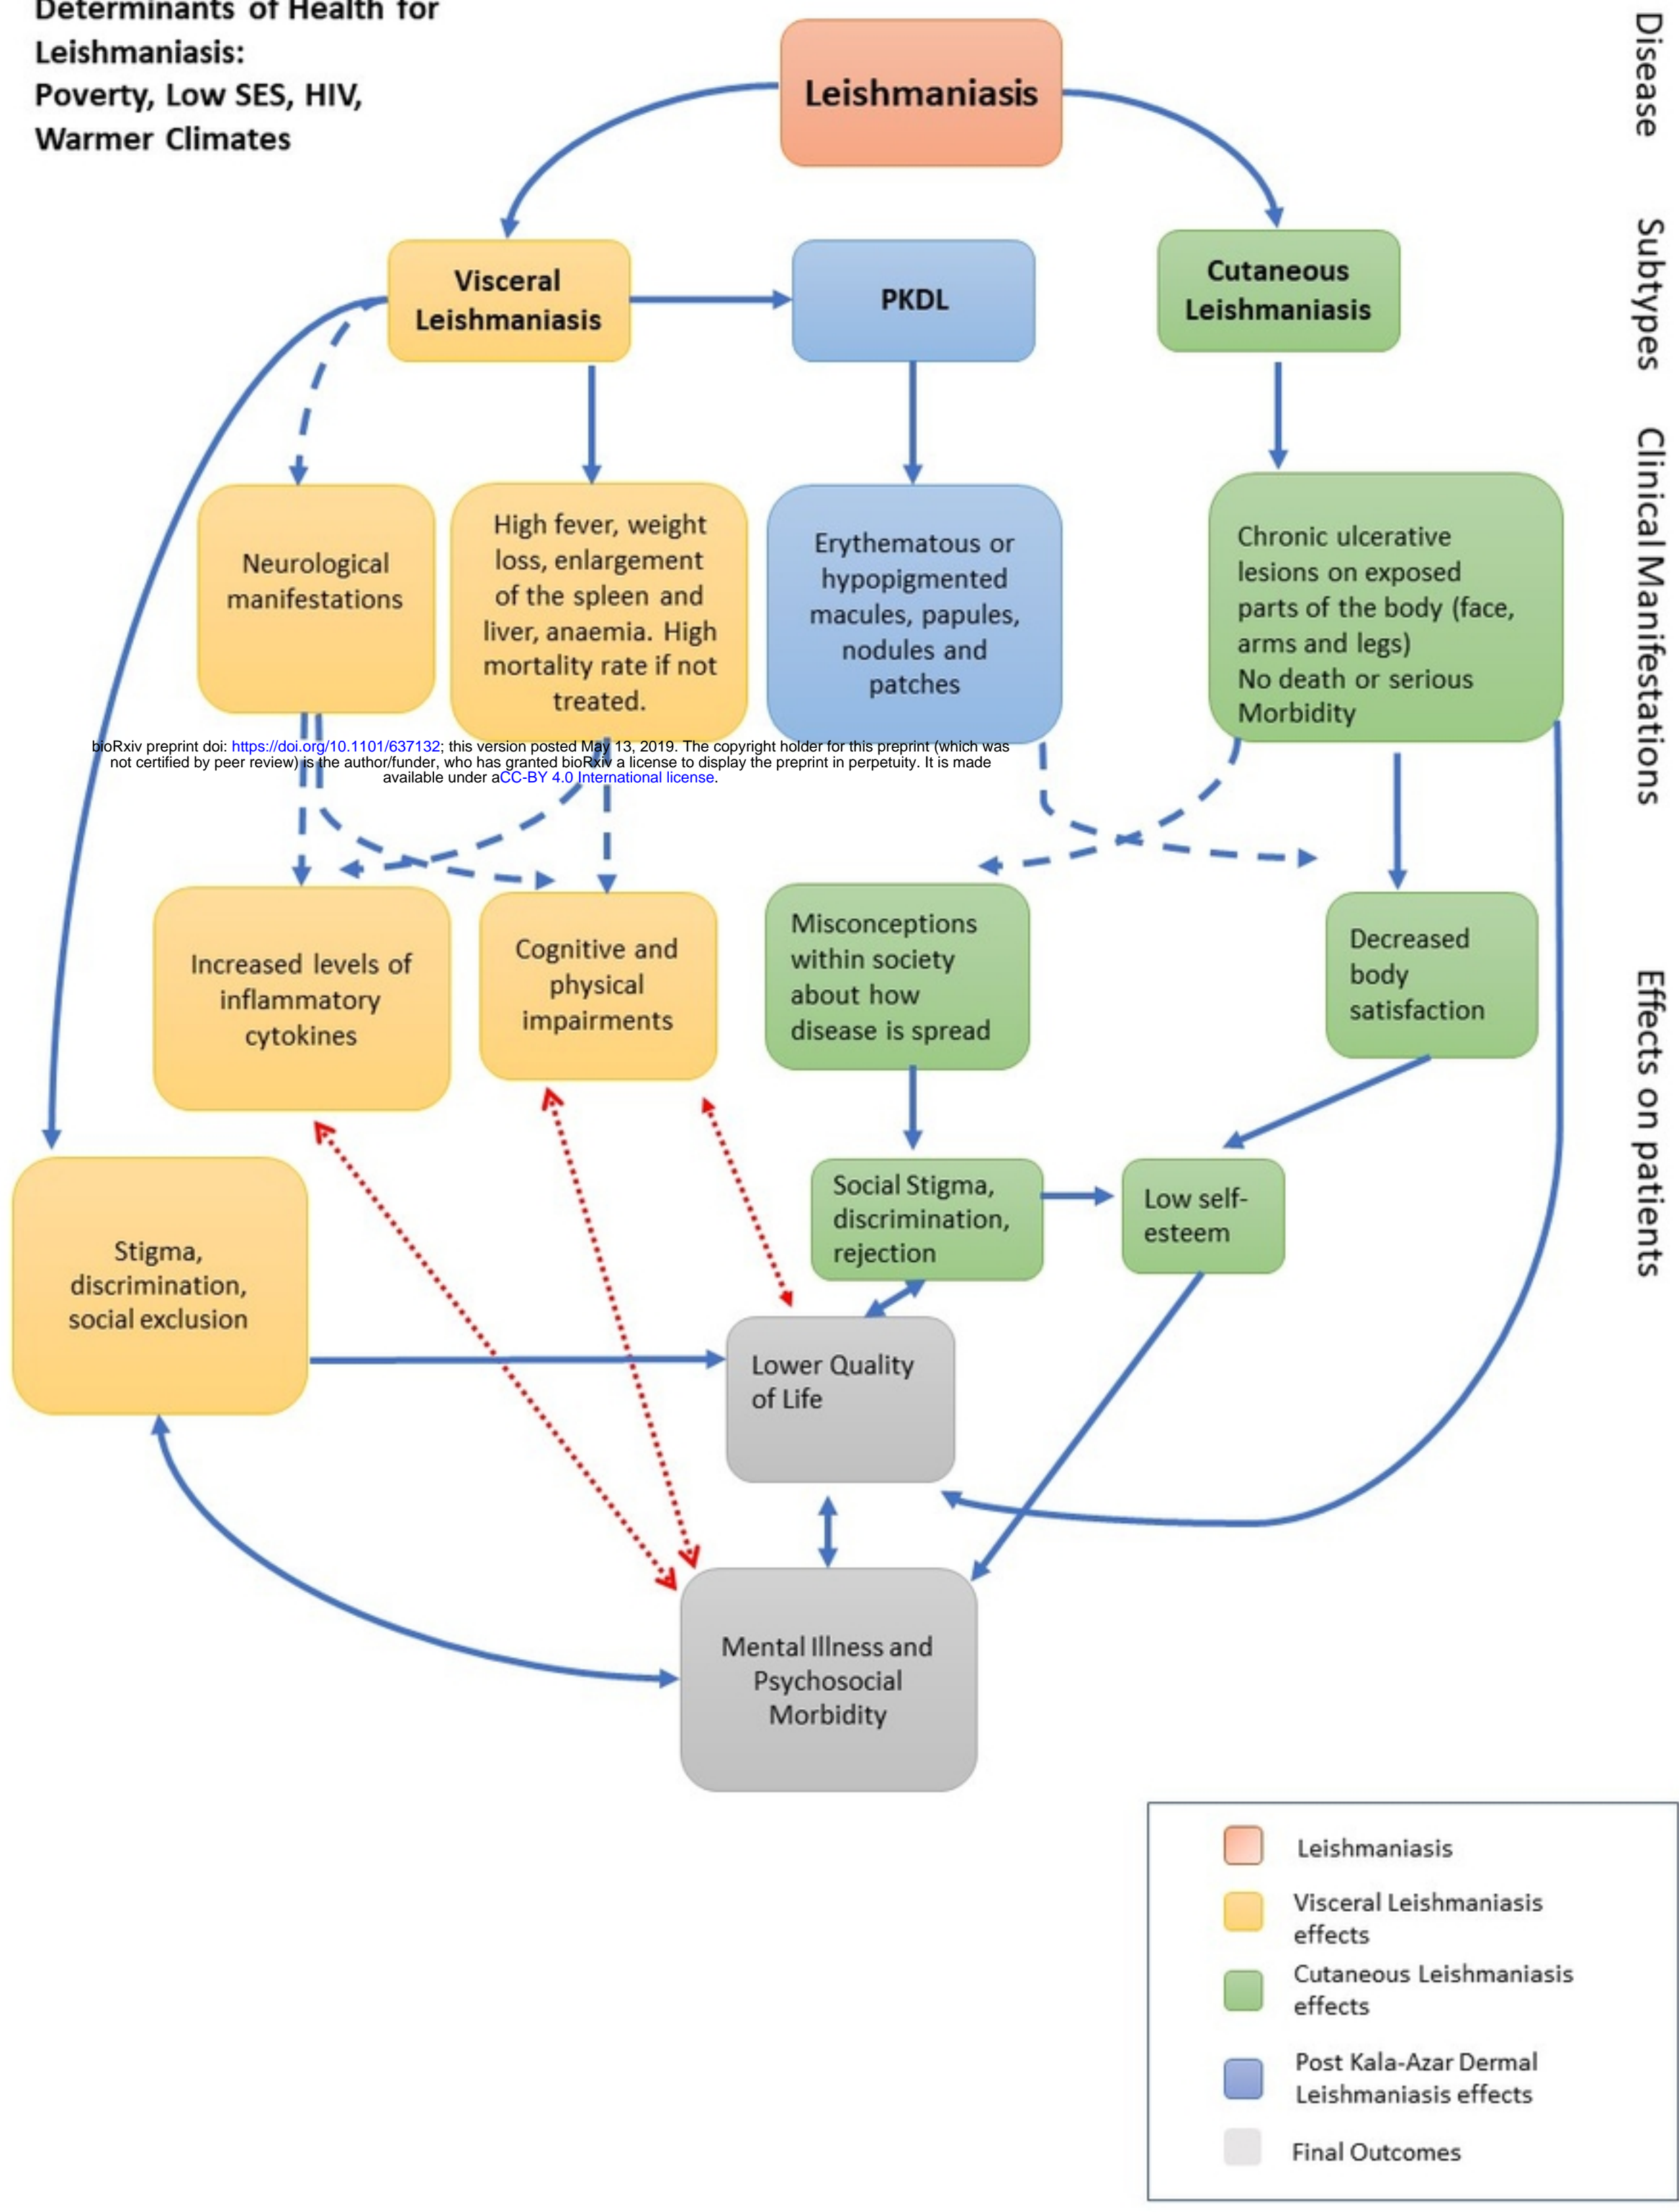

bioRxiv preprint doi: <https://doi.org/10.1101/637132>; this version posted May 13, 2019. The copyright holder for this preprint (which was not certified by peer review) is the author/funder, who has granted bioRxiv a license to display the preprint in perpetuity. It is made available under aCC-BY 4.0 International license.

Figure 1 Conceptual Framework
